# Supplementary material for: Metabolomics Reveal That the High Application of Phosphorus and Potassium in Tea Plantation Inhibited Amino-Acid Accumulation but Promoted Metabolism of Flavonoid
Source: MDPI journal article supplement (doi:10.3390/agronomy12051086), 2022-04-29
Supplement: s1 [file s1]

Table S1. Tea plants metabolites and the differences under different fertilization conditions

| metabolites                          | Log <sub>2</sub> FC |             |             |             |
|--------------------------------------|---------------------|-------------|-------------|-------------|
|                                      | T1                  | T2          | T3          | T4          |
| Norvaline                            |                     |             | −1.68       | −4.03       |
| Urea                                 |                     |             |             |             |
| 3-hydroxybutyric acid                |                     |             |             | −1.03       |
| L-alanine                            | 3.03                | 2.87        | 2.24        | 2.44        |
| N-methylalanine                      |                     |             |             |             |
| Pipecolic acid                       | −1.08               | −1.07       | −1.09       |             |
| Phenylalanine                        |                     | −1.59       | −2.56       | −3.72       |
| Methanolphosphate                    | 1.04                | 1.19        |             |             |
| Succinic acid                        |                     |             | −1.08       | −1.25       |
| L-valine                             | 1.59                | 1.66        | 1.42        | 1.44        |
| L-isoleucine                         | 0.99                | 1.15        | 0.92        |             |
| L-proline                            | 1.55                | 1.53        | 1.34        | 1.22        |
| Glycine                              | 1.44                | 1.44        | 1.18        | 1.38        |
| Fumaric acid                         | 1.01                | 0.93        |             |             |
| Serine                               | 1.27                | 1.23        | 0.94        |             |
| L-threonine                          | 2.12                | 2.02        | 1.86        | 1.97        |
| O-acetylserine                       |                     | 0.95        |             |             |
| 2-hydroxybutanoic acid               | 0.95                | 0.98        |             |             |
| N-carbamoylaspartate                 | 1.48                | 1.69        | 2.05        | 1.99        |
| N-acetylputrescine                   | 1.28                |             |             |             |
| L-tyrosine                           | 1.90                | 2.07        | 1.77        | 1.56        |
| N-acetylornithine                    |                     | 1.17        | 1.36        | 1.56        |
| Methionine                           |                     | 2.68        |             |             |
| Pyroglutamic acid                    | 2.95                | 2.22        | 2.69        | 2.85        |
| L-aspartic acid                      | 2.43                |             | 2.08        | 2.35        |
| Oxoglutaric acid                     |                     | −0.98       | −1.24       |             |
| Ornithine                            | 4.30                | 3.95        | 3.26        | 3.51        |
| L-glutamic acid                      | 1.67                | 1.61        | 1.52        | 1.68        |
| L-asparagine                         | 2.64                | 2.24        | 2.39        | 2.56        |
| Guanidinosuccinate                   | 2.82                | 2.96        | 3.14        | 2.30        |
| Tranexamic acid                      | 1.36                |             | 1.18        | 1.15        |
| L-glutamine                          | 6.24                | 5.91        | 5.57        | 5.72        |
| Saccharopine                         | 14.70               | 14.30       | 14.06       | 14.12       |
| Citrulline                           | 5.27                | 5.07        | 4.59        | 4.96        |
| Oxalic acid                          |                     | 1.13        | 1.11        | 1.14        |
| Citric acid                          |                     | −1.06       | −1.00       |             |
| L-lysine                             | −1.49               |             |             |             |
| Dl-dopa                              | −1.36               | −1.12       | −1.19       | −1.18       |
| <b>Organic acids and derivatives</b> | <b>4.15</b>         | <b>2.25</b> | <b>2.03</b> | <b>3.93</b> |
| Caprylic acid                        |                     |             | −1.22       | −3.43       |

|                                                |              |              |              |              |
|------------------------------------------------|--------------|--------------|--------------|--------------|
| 4-hydroxybutyric acid                          | 2.07         | 2.29         | 2.19         | 1.55         |
| Octadecanol                                    | 6.31         | 5.83         |              | 6.47         |
| 2-monostearin                                  | 1.02         | 0.92         |              |              |
| 2-monopalmitin                                 | 2.73         | 2.77         | 2.52         | 2.83         |
| 2-monoolein                                    | −1.78        | −1.41        | −1.53        | −1.50        |
| Maltitol                                       | 1.45         | 1.22         | 1.02         |              |
| Glycerol 3-phosphate                           |              | 1.05         |              |              |
| Chenodeoxycholic acid                          | 2.76         | 3.32         | 3.08         | 2.99         |
| Cholic acid                                    | −2.83        | −2.38        | −2.94        | −3.15        |
| Beta-sitosterol                                | −1.02        | −1.02        | −1.16        | −1.33        |
| Cholesterone                                   | −1.09        |              | −2.17        | −3.22        |
| Cholesterol                                    | −1.22        |              | −2.00        | −3.07        |
| <b>Lipids and lipid-like molecules</b>         | <b>−0.51</b> | <b>0.73</b>  | <b>−1.47</b> | <b>−1.17</b> |
| Trehalose                                      | 2.36         | 2.31         | 1.90         | 1.90         |
| Trehalose-6-phosphate                          | 1.80         | 1.89         | 1.80         | 1.70         |
| Phosphogluconic acid                           |              | 0.93         |              |              |
| Glucose                                        | 1.22         |              |              |              |
| Saccharic acid                                 | 2.14         | 1.96         |              |              |
| Gluconic acid                                  | −1.18        | −1.12        | −1.27        | −1.43        |
| Galactinol                                     | 0.98         | 1.01         |              |              |
| N-acetyl-d-hexosamine                          | 1.44         | 1.55         | 1.21         |              |
| Glucose-6-phosphate                            |              | 0.96         |              |              |
| <b>Organic oxygen compounds</b>                | <b>0.76</b>  | <b>0.85</b>  | <b>0.13</b>  | <b>1.36</b>  |
| 4-aminophenol                                  | 2.63         | 2.15         | 2.57         | 3.22         |
| Benzylalcohol                                  | 0.99         | 0.99         |              |              |
| Phenylethanol                                  | −1.39        | −0.99        | −1.62        | −1.84        |
| 1,2,3-trihydroxybenzene                        |              |              | −1.17        | −1.33        |
| Phenylpyruvic acid                             |              |              | 3.74         | 4.29         |
| 1,2,4-benzenetriol                             | 2.30         | 2.39         | 2.32         | 2.52         |
| Naproxen                                       | −1.05        |              | −1.21        | −1.29        |
| 3,4-dihydroxyphenylglycol                      | −1.03        | −1.11        | −1.12        | −1.17        |
| <b>Benzenoids</b>                              | <b>−0.83</b> | <b>−0.64</b> | <b>−1.02</b> | <b>−1.00</b> |
| Guanosine                                      | 2.07         | 1.83         | 1.65         | 1.66         |
| 1-methyladenosine                              | −1.10        |              | −1.08        | −1.09        |
| Uridine 5'-monophosphate                       | 9.41         | 9.22         | 8.90         | 9.30         |
| Adenosine                                      | 1.77         | 1.99         | 1.59         | 1.51         |
| 2'-deoxyguanosine                              | −1.31        | −1.11        | −1.40        | −1.37        |
| Cytidine                                       | −1.34        | −1.36        | −1.17        | −1.16        |
| <b>Nucleosides, nucleotides, and analogues</b> | <b>−0.39</b> | <b>−0.20</b> | <b>−0.48</b> | <b>−0.48</b> |
| Ethylamine                                     |              |              | −1.12        | −2.67        |

|                                                    |              |             |              |              |
|----------------------------------------------------|--------------|-------------|--------------|--------------|
| 2-hydroxypyrazinyl-2-propenoic acid                |              |             | −1.18        | −2.51        |
| 2-mercapto-4,6-dimethylnicotinonitrile             |              |             |              | −1.72        |
| 2-ketoglucose dimethylacetal                       | 1.15         | 1.51        | 1.16         |              |
| Isobutene glycol                                   | 1.75         | 1.70        | 1.45         | 1.32         |
| Ethanolamine                                       |              | 1.06        |              |              |
| Xylonolactone                                      |              |             | −1.56        |              |
| Cyclohexylamine                                    | 3.45         | 3.38        | 3.18         | 8.11         |
| 2,5-dihydroxypyrazine                              | 1.48         | 1.31        |              |              |
| Hydroxycarbamate                                   | 5.33         | 5.21        | 5.07         | 5.14         |
| Cyanoalanine                                       | 1.92         | 2.22        | 1.89         | 1.97         |
| Tetracosane                                        |              |             |              | 1.48         |
| Phosphenodiimidic amide                            | 0.99         | 1.13        |              |              |
| 3-indoleacetonitrile                               | 5.74         | 6.12        | 6.28         | 6.49         |
| Trans-4-hydroxyproline                             | 1.83         | 1.61        | 1.36         | 1.44         |
| 2-piperidinobenzonitrile                           | 1.39         | 1.34        | 1.23         | 1.26         |
| 5-hydroxynorvaline                                 | 9.74         | 9.47        | 9.41         | 9.67         |
| 3,17,20-trihydroxy-pregn-5-en-11-one               |              | 1.30        |              |              |
| 5,5-dimethylhydantoin                              | 4.85         | 4.26        | 4.07         | 4.32         |
| L-glutamine dehydrated                             | 11.55        | 10.93       | 10.77        | 11.19        |
| 5-hydroxypipicollic acid                           | −1.29        | −1.08       | −1.38        | −1.49        |
| Nicotianamine                                      | 1.73         | 1.80        | 1.66         | 1.64         |
| 6-hydroxy- $\alpha$ -methyl-naphthaleneacetic acid | 5.98         | 5.51        | 5.25         | 5.23         |
| D-xylulose                                         | 1.89         | 1.70        | 1.44         | 1.75         |
| Xanthurenic acid                                   | 1.23         | 1.58        | 1.22         | 1.25         |
| 6-deoxyglucitol                                    | 3.39         | 3.24        | 2.47         | 2.55         |
| Inosine-5'-monophosphate                           | 7.82         | 7.55        | 7.33         | 7.83         |
| Caffeine                                           | 1.72         | 1.81        | 1.41         | 1.28         |
| cholesterol                                        |              |             |              |              |
| Adenine                                            | 1.60         | 1.12        |              |              |
| Sophorose                                          |              | 1.03        |              |              |
| N-methyldiethanolamine                             |              |             |              |              |
| D6 cholesterol                                     |              |             |              | −1.03        |
| Epicatechin                                        |              |             | −0.99        | −1.11        |
| 2,4,7-trihydroxypteridine                          | −1.09        | −1.10       | −1.12        | −1.14        |
| Uric acid                                          | −1.24        | −1.18       | −1.82        | −1.77        |
| L-tryptophan                                       | −1.16        |             | −1.13        |              |
| Spermine                                           |              |             |              |              |
| Maltotriitol                                       |              | 1.29        |              |              |
| Trisaccharide                                      |              |             |              |              |
| 4',5-dihydroxy-7-glucosyloxyflavanone              |              |             |              |              |
| Gallocatechin                                      | −1.40        | −1.19       | −2.19        | −2.71        |
| <b>Other metabolites</b>                           | <b>−0.20</b> | <b>0.02</b> | <b>−0.75</b> | <b>−1.05</b> |
